# Supplementary material
Source: publisher figshare collection journal article supplement (https://karger.figshare.com/ndownloader/files/20225610)
Supplement: Supplementary file 1 [file 20225610]

**Online supplement 4. EEG variation over the trial**

|  | **Baseline** | | **End of 4-week intervention** | | **4-week follow-up** | |
| --- | --- | --- | --- | --- | --- | --- |
| Sham group  (n=31) | Active group  (n=31) | Sham group  (n=30) | Active group  (n=30) | Sham group  (n=30) | Active  group  (n=30) |
| *EEG results, n(%)* |  |  |  |  |  |  |
| Non-epileptiform discharge | 31(100) | 31(100) | 29(97) | 29(97) | 30(100) | 28(80) |
| Emerged epileptiform discharge | 0(0) | 0(0) | 1(3) | 1(3) | 0(0) | 2(7) |
| *Clinical judgement on patients, n(%)* | | | | | | |
| Non-epileptic seizure | 31(100) | 31(100) | 31(100) | 30(100) | 30(100) | 30(100) |
| Epileptic seizure | 0(0) | 0(0) | 0(0) | 0(0) | 0(0) | 0(0) |
| EEG, electroencephalogram | | | | | | |
